# Supplementary material for: Extracellular vesicles released from hiPSC-derived MSCs attenuate chronic prostatitis/chronic pelvic pain syndrome in rats by immunoregulation
Source: PubMed Central journal article supplement (PMC7981875; doi:10.1186/s13287-021-02269-x), 2021-03-20

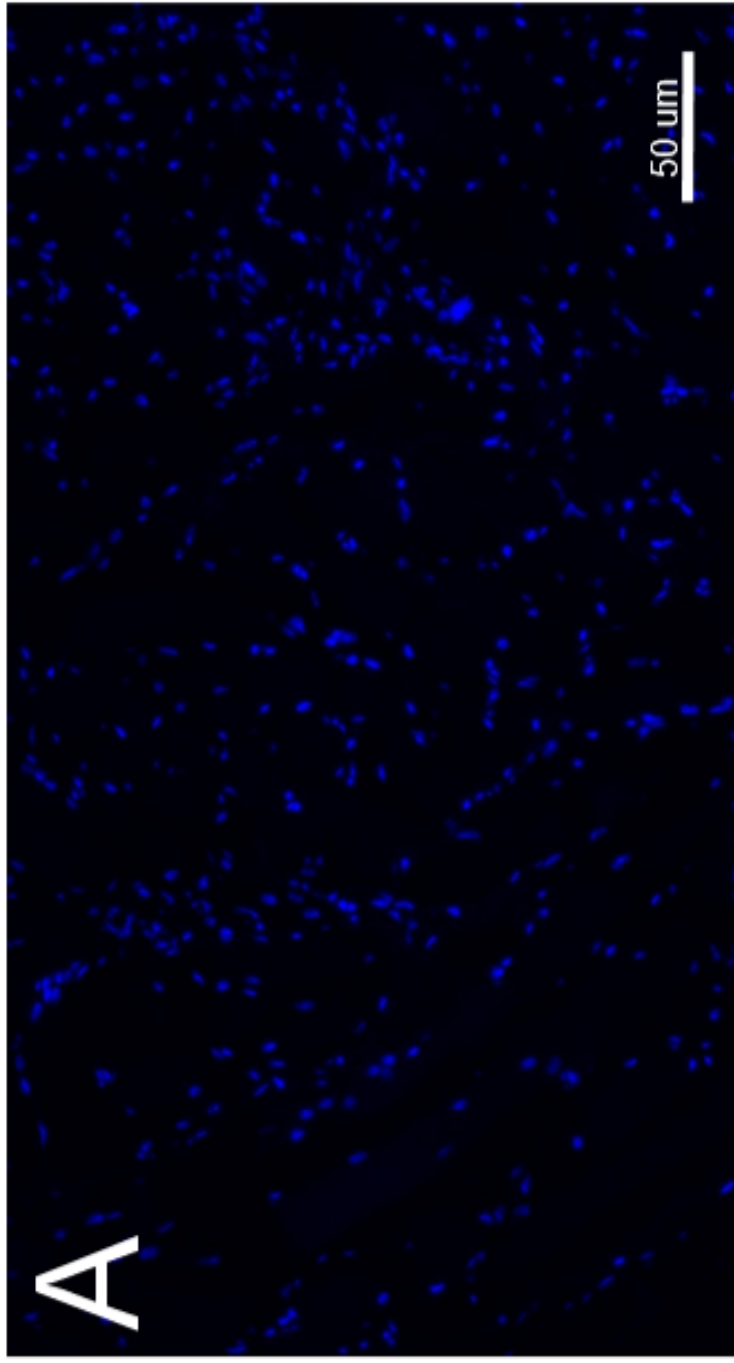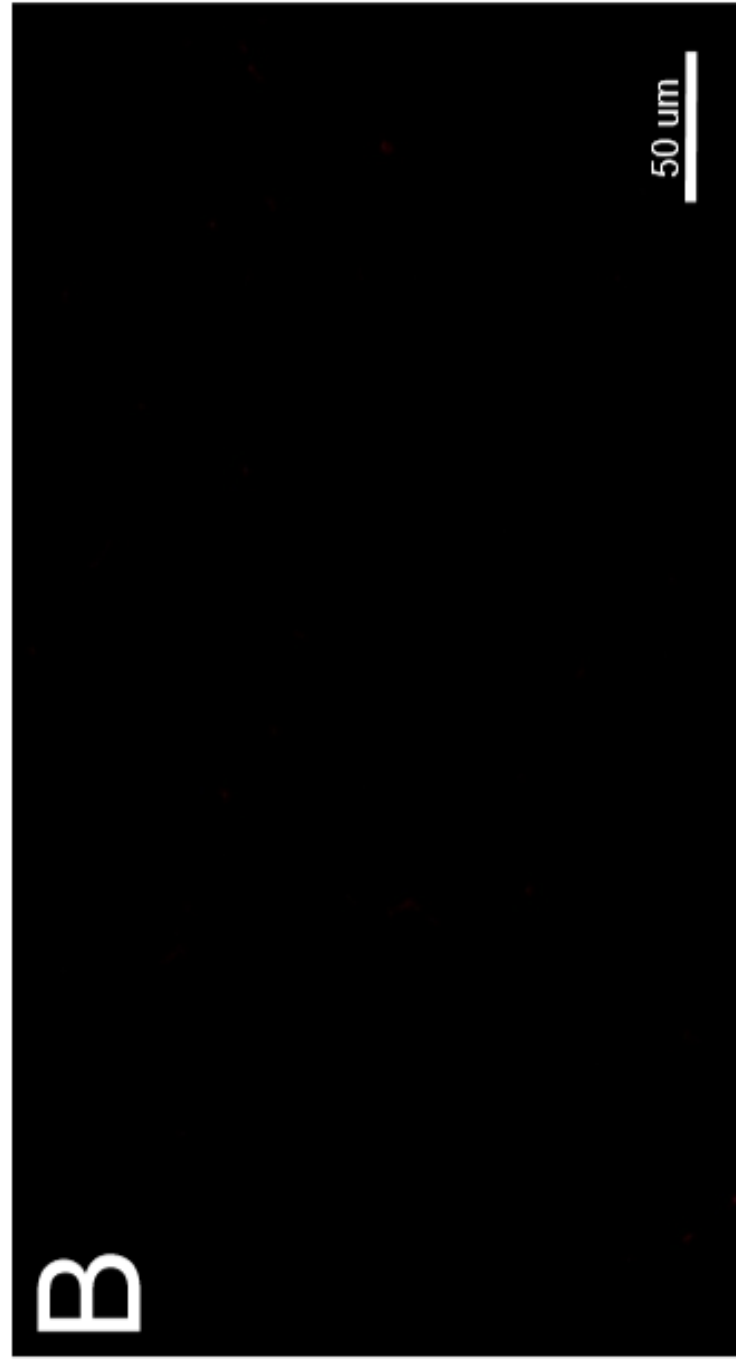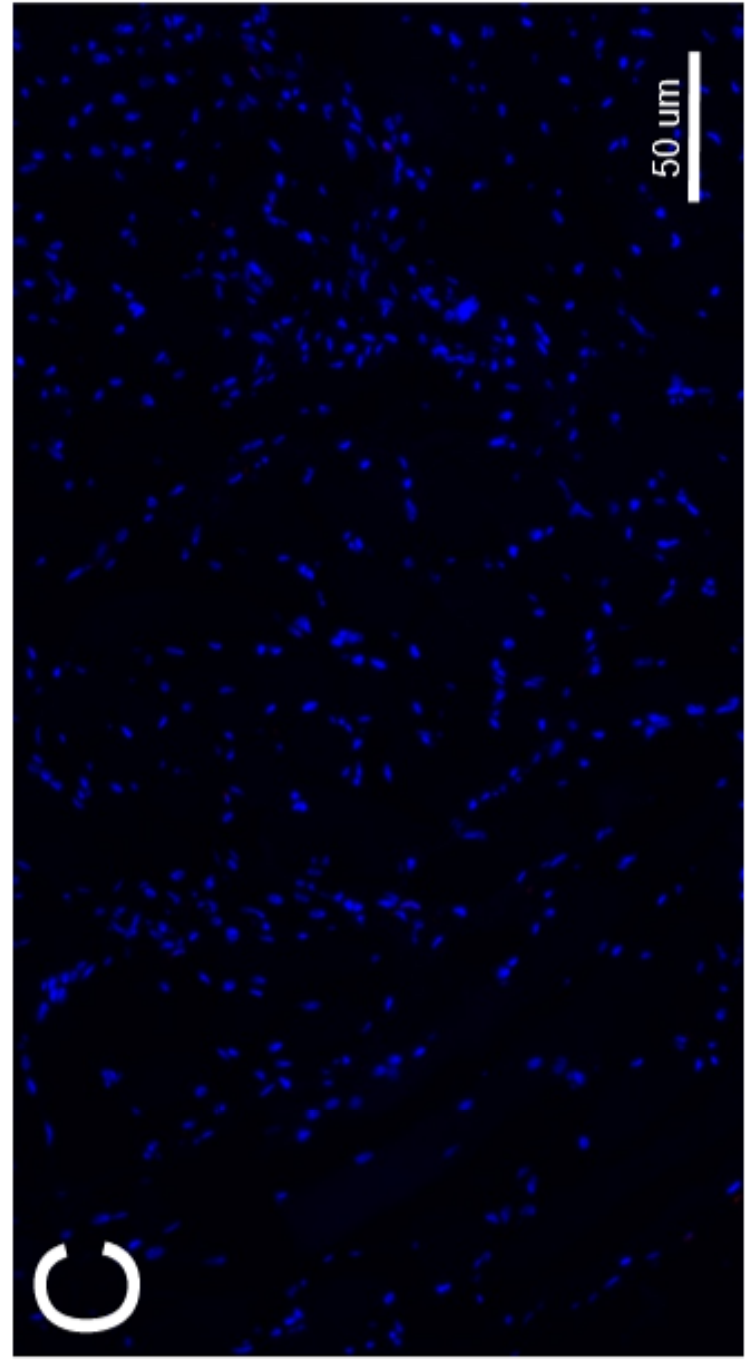

Supplement: 13287_2021_2269_MOESM1_ESM.pdf [file 13287_2021_2269_MOESM1_ESM.pdf]
